# Supplementary material for: Computational Screening of MOF-Based Mixed Matrix Membranes for CO2/N2Separations
Source: Hindawi journal article supplement (doi:10.1155/2016/6482628), 2016-01-01
Supplement: f1 [file 6482628.f1.docx]

**Supplementary Material for**

**Computational Screening of MOF-based Mixed Matrix Membranes for CO2/N2 Separations**

Zeynep Sumer and Seda Keskin*

Department of Chemical and Biological Engineering, Koc University, Rumelifeneri Yolu, Sariyer, 34450, Istanbul, Turkey

**Table S1.** Structural properties of MOFs.*

| **REFCODE** | **LCD (Å)** | **PLD (Å)** | **Surface Area (m2/g)** | **Pore Volume (cm3/g)** |
| --- | --- | --- | --- | --- |
| EDUSIF (IRMOF-1) | 15.06 | 7.93 | 3685.93 | 1.36 | |
| EDUSUR (IRMOF-3) | 14.97 | 6.61 | 2675.83 | 1.06 | |
| EDUVII (IRMOF-10) | 20.32 | 9.78 | 4540.87 | 2.03 | |
| EDUVOO (IRMOF-14) | 20.94 | 10.64 | 4847.41 | 2.31 | |
| EHALOP (MIL-53-Al) | 7.52 | 7.08 | 1671.71 | 0.69 | |
| FAYPUS (DMOF-5) | 13.62 | 4.26 | 1598.02 | 0.78 | |
| FEVFUJ | 11.00 | 10.18 | 1826.46 | 0.83 | |
| FECXUI (IRMOF-8) | 5.41 | 3.62 | 915.95 | 0.58 | |
| FIQCEN (CuBTC) | 11.12 | 5.24 | 1823.14 | 0.72 | |
| GALBUS | 9.07 | 6.25 | 1368.15 | 0.62 | |
| GALHUY | 9.78 | 4.70 | 2225.98 | 0.79 | |
| GITTUZ (ZIF-68) | 10.86 | 8.04 | 1169.97 | 0.60 | |
| GITVEL (ZIF-70) | 15.25 | 13.38 | 2177.20 | 0.94 | |
| GIVDUL | 6.31 | 4.76 | 704.16 | 0.32 | |
| GUPCOK | 7.33 | 4.70 | 973.12 | 0.56 | |
| GUSLUC | 4.66 | 3.70 | 270.70 | 0.35 | |
| HAJKIO | 6.67 | 3.47 | 801.32 | 0.39 | |
| HAJKOU | 6.23 | 3.27 | 892.17 | 0.39 | |
| HASSUR | 7.03 | 5.33 | 1831.69 | 0.63 | |
| HECQUB | 8.60 | 5.10 | 2679.72 | 0.88 | |
| HIFVUO | 7.50 | 5.98 | 2382.16 | 0.87 | |
| IDIWOH (MIL-47) | 7.68 | 7.19 | 1534.78 | 0.63 | |
| IMIXEI | 7.09 | 5.53 | 2886.52 | 0.89 | |
| JENKIX | 9.92 | 7.49 | 1105.15 | 0.56 | |
| KARLAS (MCF-19-Ia) | 7.97 | 4.30 | 855.13 | 0.57 | |
| KEYFIF | 5.40 | 4.90 | 214.08 | 0.25 | |
| KEYFIF01 | 5.33 | 4.84 | 191.96 | 0.24 | |
| KIPKIF | 10.42 | 10.33 | 612.78 | 0.50 | |
| LARVIL | 7.32 | 7.08 | 347.97 | 0.24 | |
| LECQEQ (Ni-MOF-74) | 11.46 | 10.71 | 1242.20 | 0.54 | |
| LUMDIG | 7.91 | 4.95 | 880.17 | 0.42 | |
| MOCKEV (PCN-10) | 10.91 | 3.75 | 2154.65 | 0.86 | |
| NEFTOJ | 4.65 | 3.63 | 1049.96 | 0.56 | |
| NIBHOW | 22.93 | 14.89 | 5202.76 | 3.03 | |
| NIMPEG01 (PCN-39) | 5.87 | 5.25 | 2557.83 | 0.88 | |
| NUJCIE | 4.30 | 3.45 | 176.25 | 0.28 | |
| NUTQAV (PCN-16) | 10.91 | 4.12 | 2772.48 | 0.94 | |
| NUTQEZ (PCN-16’) | 11.70 | 4.31 | 2392.98 | 0.81 | |
| OCIZIL | 4.79 | 3.72 | 90.76 | 0.31 | |
| OHUKIM | 14.71 | 8.30 | 4642.30 | 1.88 | |
| OWITAQ | 7.59 | 5.36 | 4752.93 | 1.18 | |
| OWITEU | 7.56 | 5.32 | 4837.06 | 1.19 | |
| OWITIY | 7.66 | 5.80 | 5105.51 | 1.30 | |
| OWITOE | 7.52 | 5.28 | 4809.83 | 1.17 | |
| OWITUK | 7.56 | 5.32 | 4875.38 | 1.19 | |
| OWIVAS | 7.56 | 5.34 | 4707.92 | 1.17 | |
| OWIVEW | 6.91 | 4.45 | 3152.82 | 0.86 | |
| PEVQEO | 14.85 | 7.96 | 3614.62 | 1.33 | |
| PODKUQ | 22.15 | 8.48 | 4273.23 | 1.78 | |
| PURQOJ | 11.31 | 6.85 | 2364.67 | 0.82 | |
| QIFLOI | 5.21 | 3.05 | 101.36 | 0.35 | |
| QOWQUO (MOF-14) | 16.36 | 2.71 | 2797.39 | 0.90 | |
| RAYKEJ | 9.59 | 7.36 | 1000.19 | 0.54 | |
| RAYKIN | 9.48 | 7.12 | 968.14 | 0.53 | |
| RAYKUZ | 8.95 | 5.83 | 936.93 | 0.52 | |
| RAYLAG | 8.06 | 5.70 | 932.94 | 0.51 | |
| RAYLEK | 8.03 | 5.63 | 890.67 | 0.51 | |
| RAYLIO | 7.61 | 5.06 | 953.14 | 0.49 | |
| RAYLOU | 6.83 | 5.20 | 984.01 | 0.48 | |
| RAYLUA | 6.56 | 4.80 | 916.67 | 0.48 | |
| SOQSAU (BUT-10) | 9.55 | 4.98 | 2420.70 | 0.81 | |
| SOQSEY (BUT-11) | 10.25 | 4.93 | 1987.79 | 0.76 | |
| VEJYOZ (ZIF-3) | 8.47 | 5.70 | 2016.54 | 0.78 | |
| VEJZIU (ZIF-10) | 12.35 | 7.49 | 2010.53 | 0.84 | |
| VOGTIV (Mg-MOF-74) | 9.85 | 8.26 | 1300.53 | 0.58 | |
| WOBHIF (Zn-MOF-74) | 11.58 | 10.81 | 1167.10 | 0.52 | |
| XALXUF01 (CuTDPAT) | 16.56 | 5.57 | 1381.08 | 0.85 | |
| YOZBIZ01 (ZIF-78) | 8.89 | 6.10 | 803.24 | 0.48 | |
| YOZBOF (ZIF-79) | 8.00 | 4.95 | 426.36 | 0.43 | |
| YUVSUE (BioMOF-11) | 5.76 | 4.59 | 851.70 | 0.44 | |

*Poreblazer could not calculate the surface area of QIFLOI, therefore we used Düren et al.’s method[1] with UFF parameters. Probe size was set to 3.681 Å and the number of trial insertions was set to 5000 in that algorithm.

**Table S2.** Permeability and selectivity of polymers. Data is taken from Robeson.[2]

| **Polymer** | **PCO2 (Barrer)** | **PN2 (Barrer)** | **SCO2/N2** |
| --- | --- | --- | --- |
| Ultem | 1.4 | 0.06 | 25 |
| Matrimid | 9 | 0.25 | 36 |
| polyimide | 45 | 1.27 | 35.43 |
| MEEP | 250 | 4 | 62.5 |
| 6FDA-DAM | 842.41 | 54.99 | 15.32 |
| PIM-7 | 1100 | 42 | 26.19 |
| modified PDMS | 2000 | 58.5 | 34.19 |
| PIM-1 | 2300 | 92 | 25 |
| PTMGP | 14000 | 1000 | 14 |
| PTMSP | 29000 | 2700 | 10.74 |

**Table S3.** Forcefield used in molecular simulations of MOFs.

| **REFCODE** | **Force Field** | **REFCODE** | **Force Field** |
| --- | --- | --- | --- |
| EDUSIF | UFF | NUJCIE | UFF |
| EDUSUR | UFF | NUTQAV | DREIDING |
| EDUVII | DREIDING | NUTQEZ | DREIDING |
| EDUVOO | DREIDING | OCIZIL | UFF |
| EHALOP | UFF | OHUKIM | UFF |
| FAYPUS | DREIDING | OWITAQ | UFF |
| FEVFUJ | DREIDING | OWITEU | UFF |
| FECXUI | DREIDING | OWITIY | UFF |
| FIQCEN | DREIDING | OWITOE | UFF |
| GALBUS | DREIDING | OWITUK | UFF |
| GALHUY | DREIDING | OWIVAS | UFF |
| GITTUZ | DREIDING | OWIVEW | UFF |
| GITVEL | DREIDING | PEVQEO | UFF |
| GIVDUL | DREIDING | PODKUQ | UFF |
| GUPCOK | DREIDING | PURQOJ | UFF |
| GUSLUC | DREIDING | QIFLOI | UFF |
| HAJKIO | DREIDING | QOWQUO | DREIDING |
| HAJKOU | DREIDING | RAYKEJ | UFF |
| HASSUR | DREIDING | RAYKIN | UFF |
| HECQUB | DREIDING | RAYKUZ | UFF |
| HIFVUO | DREIDING | RAYLAG | UFF |
| IDIWOH | DREIDING | RAYLEK | UFF |
| IMIXEI | DREIDING | RAYLIO | UFF |
| JENKIX | DREIDING | RAYLOU | UFF |
| KARLAS | DREIDING | RAYLUA | UFF |
| KEYFIF | DREIDING | SOQSAU | DREIDING |
| KEYFIF01 | DREIDING | SOQSEY | DREIDING |
| KIPKIF | DREIDING | VEJYOZ | DREIDING |
| LARVIL | UFF | VEJZIU | DREIDING |
| LECQEQ | UFF | VOGTIV | DREIDING |
| LUMDIG | UFF | WOBHIF | DREIDING |
| MOCKEV | DREIDING | XALXUF01 | DREIDING |
| NEFTOJ | DREIDING | YOZBIZ01 | DREIDING |
| NIBHOW | DREIDING | YOZBOF | DREIDING |
| NIMPEG01 | DREIDING | YUVSUE | UFF |

**Table S4.** Calculated permeability and selectivity data of MOFs.

| **REFCODE** | **PCO2**  **(Barrer)** | **PN2**  **(Barrer)** | **SCO2/N2** | **REFCODE** | **PCO2**  **(Barrer)** | **PN2**  **(Barrer)** | **SCO2/N2** |
| --- | --- | --- | --- | --- | --- | --- | --- |
| EDUSIF | 248055.53 | 161812.06 | 1.53 | NUJCIE | 259189.19 | 5334.40 | 48.59 |
| EDUSUR | 89469.47 | 136662.96 | 0.65 | NUTQAV | 662910.22 | 64086.03 | 10.34 |
| EDUVII | 750391.61 | 564449.61 | 1.33 | NUTQEZ | 1283476.20 | 134367.94 | 9.55 |
| EDUVOO | 230761.17 | 159060.87 | 1.45 | OCIZIL | 484788.70 | 264877.93 | 1.83 |
| EHALOP | 3810483.09 | 1039911.52 | 3.66 | OHUKIM | 459543.21 | 234305.84 | 1.96 |
| FAYPUS | 82557.61 | 51088.99 | 1.62 | OWITAQ | 832012.08 | 412003.57 | 2.02 |
| FEVFUJ | 40491.81 | 83187.03 | 0.49 | OWITEU | 878701.57 | 245984.05 | 3.57 |
| FECXUI | 161663.36 | 104989.79 | 1.54 | OWITIY | 752611.95 | 290925.28 | 2.59 |
| FIQCEN | 501532.33 | 49799.88 | 10.07 | OWITOE | 1182658.40 | 393241.04 | 3.01 |
| GALBUS | 3860998.62 | 1023218.82 | 3.77 | OWITUK | 1102481.92 | 346693.15 | 3.18 |
| GALHUY | 641991.61 | 216976.51 | 2.96 | OWIVAS | 1113358.91 | 321974.81 | 3.46 |
| GITTUZ | 147793.18 | 89705.89 | 1.65 | OWIVEW | 979637.89 | 181115.59 | 5.41 |
| GITVEL | 79142.49 | 172541.87 | 0.46 | PEVQEO | 377507.01 | 131648.75 | 2.87 |
| GIVDUL | 179983.26 | 46667.15 | 3.86 | PODKUQ | 268948.10 | 162768.67 | 1.65 |
| GUPCOK | 213936.39 | 53129.80 | 4.03 | PURQOJ | 439299.73 | 105709.36 | 4.16 |
| GUSLUC | 66334.26 | 33338.20 | 1.99 | QIFLOI | 114200.69 | 17804.83 | 6.41 |
| HAJKIO | 780097.39 | 68281.24 | 11.42 | QOWQUO | 138909.54 | 74769.13 | 1.86 |
| HAJKOU | 752592.37 | 12664.41 | 59.43 | RAYKEJ | 859205.02 | 219801.96 | 3.91 |
| HASSUR | 1368332.43 | 368288.66 | 3.72 | RAYKIN | 338385.50 | 145463.26 | 2.33 |
| HECQUB | 1197848.42 | 315763.87 | 3.79 | RAYKUZ | 477762.42 | 202529.83 | 2.36 |
| HIFVUO | 343152.22 | 152947.03 | 2.24 | RAYLAG | 461506.18 | 95586.96 | 4.83 |
| IDIWOH | 9943242.60 | 1699898.18 | 5.85 | RAYLEK | 402353.80 | 132405.33 | 3.04 |
| IMIXEI | 516967.44 | 86429.25 | 5.98 | RAYLIO | 249259.55 | 202424.79 | 1.23 |
| JENKIX | 52211.95 | 51896.57 | 1.01 | RAYLOU | 215724.82 | 145120.21 | 1.49 |
| KARLAS | 100470.28 | 57673.00 | 1.74 | RAYLUA | 677139.27 | 113474.19 | 5.97 |
| KEYFIF | 154407.00 | 80382.66 | 1.92 | SOQSAU | 260057.29 | 69680.84 | 3.73 |
| KEYFIF01 | 101347.16 | 98653.01 | 1.03 | SOQSEY | 153687.16 | 29982.45 | 5.13 |
| KIPKIF | 431823.75 | 126146.10 | 3.42 | VEJYOZ | 117902.45 | 66499.40 | 1.77 |
| LARVIL | 7052184.71 | 131439.91 | 53.65 | VEJZIU | 240292.89 | 102703.76 | 2.34 |
| LECQEQ | 1425808.39 | 969275.16 | 1.47 | VOGTIV | 719273.50 | 588304.69 | 1.22 |
| LUMDIG | 559027.00 | 118938.48 | 4.70 | WOBHIF | 6893062.80 | 1263801.28 | 5.45 |
| MOCKEV | 256998.63 | 87201.89 | 2.95 | XALXUF01 | 360548.75 | 124427.10 | 2.90 |
| NEFTOJ | 505878.3 | 59361.54 | 8.52 | YOZBIZ01 | 241602.71 | 119716.26 | 2.02 |
| NIBHOW | 297429.61 | 207749.42 | 1.43 | YOZBOF | 87832.18 | 120703.68 | 0.73 |
| NIMPEG01 | 71010.81 | 71005.17 | 1.00 | YUVSUE | 272120.77 | 58360.15 | 4.66 |

**Table S5.** Calculated permeability and selectivity data for Ultem-based MMMs.

| **ϕ = 0.3** | **PCO2 (Barrer)** | **SCO2/N2** | **ϕ = 0.3** | **PCO2 (Barrer)** | **SCO2/N2** |
| --- | --- | --- | --- | --- | --- |
| EDUSIF | 3.20 | 25.00 | NUJCIE | 3.20 | 25.00 |
| EDUSUR | 3.20 | 25.00 | NUTQAV | 3.20 | 25.00 |
| EDUVII | 3.20 | 25.00 | NUTQEZ | 3.20 | 25.00 |
| EDUVOO | 3.20 | 25.00 | OCIZIL | 3.20 | 25.00 |
| EHALOP | 3.20 | 25.00 | OHUKIM | 3.20 | 25.00 |
| FAYPUS | 3.20 | 25.00 | OWITAQ | 3.20 | 25.00 |
| FEVFUJ | 3.20 | 25.00 | OWITEU | 3.20 | 25.00 |
| FECXUI | 3.20 | 25.00 | OWITIY | 3.20 | 25.00 |
| FIQCEN | 3.20 | 25.00 | OWITOE | 3.20 | 25.00 |
| GALBUS | 3.20 | 25.00 | OWITUK | 3.20 | 25.00 |
| GALHUY | 3.20 | 25.00 | OWIVAS | 3.20 | 25.00 |
| GITTUZ | 3.20 | 25.00 | OWIVEW | 3.20 | 25.00 |
| GITVEL | 3.20 | 25.00 | PEVQEO | 3.20 | 25.00 |
| GIVDUL | 3.20 | 25.00 | PODKUQ | 3.20 | 25.00 |
| GUPCOK | 3.20 | 25.00 | PURQOJ | 3.20 | 25.00 |
| GUSLUC | 3.20 | 25.00 | QIFLOI | 3.20 | 25.00 |
| HAJKIO | 3.20 | 25.00 | QOWQUO | 3.20 | 25.00 |
| HAJKOU | 3.20 | 25.00 | RAYKEJ | 3.20 | 25.00 |
| HASSUR | 3.20 | 25.00 | RAYKIN | 3.20 | 25.00 |
| HECQUB | 3.20 | 25.00 | RAYKUZ | 3.20 | 25.00 |
| HIFVUO | 3.20 | 25.00 | RAYLAG | 3.20 | 25.00 |
| IDIWOH | 3.20 | 25.00 | RAYLEK | 3.20 | 25.00 |
| IMIXEI | 3.20 | 25.00 | RAYLIO | 3.20 | 25.00 |
| JENKIX | 3.20 | 25.00 | RAYLOU | 3.20 | 25.00 |
| KARLAS | 3.20 | 25.00 | RAYLUA | 3.20 | 25.00 |
| KEYFIF | 3.20 | 25.00 | SOQSAU | 3.20 | 25.00 |
| KEYFIF01 | 3.20 | 25.00 | SOQSEY | 3.20 | 25.00 |
| KIPKIF | 3.20 | 25.00 | VEJYOZ | 3.20 | 25.00 |
| LARVIL | 3.20 | 25.00 | VEJZIU | 3.20 | 25.00 |
| LECQEQ | 3.20 | 25.00 | VOGTIV | 3.20 | 25.00 |
| LUMDIG | 3.20 | 25.00 | WOBHIF | 3.20 | 25.00 |
| MOCKEV | 3.20 | 25.00 | XALXUF01 | 3.20 | 25.00 |
| NEFTOJ | 3.20 | 25.00 | YOZBIZ01 | 3.20 | 25.00 |
| NIBHOW | 3.20 | 25.00 | YOZBOF | 3.20 | 25.00 |
| NIMPEG01 | 3.20 | 25.00 | YUVSUE | 3.20 | 25.00 |

**Table S6.** Calculated permeability and selectivity data for Matrimid-based MMMs.

| **ϕ = 0.3** | **PCO2 (Barrer)** | **SCO2/N2** | **ϕ = 0.3** | **PCO2 (Barrer)** | **SCO2/N2** |
| --- | --- | --- | --- | --- | --- |
| EDUSIF | 20.57 | 36.00 | NUJCIE | 20.57 | 36.00 |
| EDUSUR | 20.57 | 35.99 | NUTQAV | 20.57 | 36.00 |
| EDUVII | 20.57 | 36.00 | NUTQEZ | 20.57 | 36.00 |
| EDUVOO | 20.57 | 36.00 | OCIZIL | 20.57 | 36.00 |
| EHALOP | 20.57 | 36.00 | OHUKIM | 20.57 | 36.00 |
| FAYPUS | 20.57 | 35.99 | OWITAQ | 20.57 | 36.00 |
| FEVFUJ | 20.56 | 35.98 | OWITEU | 20.57 | 36.00 |
| FECXUI | 20.57 | 36.00 | OWITIY | 20.57 | 36.00 |
| FIQCEN | 20.57 | 36.00 | OWITOE | 20.57 | 36.00 |
| GALBUS | 20.57 | 36.00 | OWITUK | 20.57 | 36.00 |
| GALHUY | 20.57 | 36.00 | OWIVAS | 20.57 | 36.00 |
| GITTUZ | 20.57 | 35.99 | OWIVEW | 20.57 | 36.00 |
| GITVEL | 20.57 | 35.99 | PEVQEO | 20.57 | 36.00 |
| GIVDUL | 20.57 | 36.00 | PODKUQ | 20.57 | 36.00 |
| GUPCOK | 20.57 | 36.00 | PURQOJ | 20.57 | 36.00 |
| GUSLUC | 20.56 | 35.99 | QIFLOI | 20.57 | 35.99 |
| HAJKIO | 20.57 | 36.00 | QOWQUO | 20.57 | 35.99 |
| HAJKOU | 20.57 | 36.00 | RAYKEJ | 20.57 | 36.00 |
| HASSUR | 20.57 | 36.00 | RAYKIN | 20.57 | 36.00 |
| HECQUB | 20.57 | 36.00 | RAYKUZ | 20.57 | 36.00 |
| HIFVUO | 20.57 | 36.00 | RAYLAG | 20.57 | 36.00 |
| IDIWOH | 20.57 | 36.00 | RAYLEK | 20.57 | 36.00 |
| IMIXEI | 20.57 | 36.00 | RAYLIO | 20.57 | 36.00 |
| JENKIX | 20.56 | 35.99 | RAYLOU | 20.57 | 36.00 |
| KARLAS | 20.57 | 35.99 | RAYLUA | 20.57 | 36.00 |
| KEYFIF | 20.57 | 36.00 | SOQSAU | 20.57 | 36.00 |
| KEYFIF01 | 20.57 | 35.99 | SOQSEY | 20.57 | 36.00 |
| KIPKIF | 20.57 | 36.00 | VEJYOZ | 20.57 | 35.99 |
| LARVIL | 20.57 | 36.00 | VEJZIU | 20.57 | 36.00 |
| LECQEQ | 20.57 | 36.00 | VOGTIV | 20.57 | 36.00 |
| LUMDIG | 20.57 | 36.00 | WOBHIF | 20.57 | 36.00 |
| MOCKEV | 20.57 | 36.00 | XALXUF01 | 20.57 | 36.00 |
| NEFTOJ | 20.57 | 36.00 | YOZBIZ01 | 20.57 | 36.00 |
| NIBHOW | 20.57 | 36.00 | YOZBOF | 20.57 | 35.99 |
| NIMPEG01 | 20.57 | 35.99 | YUVSUE | 20.57 | 36.00 |

**Table S7.** Calculated permeability and selectivity data for polyimide-based MMMs.

| **ϕ = 0.3** | **PCO2 (Barrer)** | **SCO2/N2** | **ϕ = 0.3** | **PCO2 (Barrer)** | **SCO2/N2** |
| --- | --- | --- | --- | --- | --- |
| EDUSIF | 102.81 | 35.42 | NUJCIE | 102.81 | 35.44 |
| EDUSUR | 102.73 | 35.39 | NUTQAV | 102.84 | 35.43 |
| EDUVII | 102.84 | 35.43 | NUTQEZ | 102.85 | 35.43 |
| EDUVOO | 102.81 | 35.42 | OCIZIL | 102.83 | 35.43 |
| EHALOP | 102.85 | 35.43 | OHUKIM | 102.83 | 35.43 |
| FAYPUS | 102.72 | 35.39 | OWITAQ | 102.84 | 35.43 |
| FEVFUJ | 102.58 | 35.34 | OWITEU | 102.84 | 35.43 |
| FECXUI | 102.79 | 35.41 | OWITIY | 102.84 | 35.43 |
| FIQCEN | 102.83 | 35.43 | OWITOE | 102.85 | 35.43 |
| GALBUS | 102.85 | 35.43 | OWITUK | 102.85 | 35.43 |
| GALHUY | 102.84 | 35.43 | OWIVAS | 102.85 | 35.43 |
| GITTUZ | 102.78 | 35.41 | OWIVEW | 102.85 | 35.43 |
| GITVEL | 102.72 | 35.39 | PEVQEO | 102.83 | 35.42 |
| GIVDUL | 102.80 | 35.41 | PODKUQ | 102.82 | 35.42 |
| GUPCOK | 102.81 | 35.42 | PURQOJ | 102.83 | 35.43 |
| GUSLUC | 102.69 | 35.38 | QIFLOI | 102.76 | 35.41 |
| HAJKIO | 102.84 | 35.43 | QOWQUO | 102.78 | 35.41 |
| HAJKOU | 102.84 | 35.44 | RAYKEJ | 102.84 | 35.43 |
| HASSUR | 102.85 | 35.43 | RAYKIN | 102.82 | 35.42 |
| HECQUB | 102.85 | 35.43 | RAYKUZ | 102.83 | 35.43 |
| HIFVUO | 102.82 | 35.42 | RAYLAG | 102.83 | 35.43 |
| IDIWOH | 102.86 | 35.43 | RAYLEK | 102.83 | 35.42 |
| IMIXEI | 102.84 | 35.43 | RAYLIO | 102.81 | 35.42 |
| JENKIX | 102.64 | 35.36 | RAYLOU | 102.81 | 35.42 |
| KARLAS | 102.75 | 35.40 | RAYLUA | 102.84 | 35.43 |
| KEYFIF | 102.78 | 35.41 | SOQSAU | 102.81 | 35.42 |
| KEYFIF01 | 102.75 | 35.40 | SOQSEY | 102.78 | 35.41 |
| KIPKIF | 102.83 | 35.43 | VEJYOZ | 102.76 | 35.40 |
| LARVIL | 102.86 | 35.43 | VEJZIU | 102.81 | 35.42 |
| LECQEQ | 102.85 | 35.43 | VOGTIV | 102.84 | 35.43 |
| LUMDIG | 102.84 | 35.43 | WOBHIF | 102.86 | 35.43 |
| MOCKEV | 102.81 | 35.42 | XALXUF01 | 102.83 | 35.42 |
| NEFTOJ | 102.84 | 35.43 | YOZBIZ01 | 102.81 | 35.42 |
| NIBHOW | 102.82 | 35.42 | YOZBOF | 102.73 | 35.39 |
| NIMPEG01 | 102.70 | 35.38 | YUVSUE | 102.82 | 35.42 |

**Table S8.** Calculated permeability and selectivity data for MEEP-based MMMs.

| **ϕ = 0.3** | **PCO2 (Barrer)** | **SCO2/N2** | **ϕ = 0.3** | **PCO2 (Barrer)** | **SCO2/N2** |
| --- | --- | --- | --- | --- | --- |
| EDUSIF | 570.04 | 62.35 | NUJCIE | 570.10 | 62.47 |
| EDUSUR | 567.61 | 62.09 | NUTQAV | 570.91 | 62.45 |
| EDUVII | 570.97 | 62.45 | NUTQEZ | 571.16 | 62.48 |
| EDUVOO | 569.94 | 62.34 | OCIZIL | 570.72 | 62.42 |
| EHALOP | 571.34 | 62.49 | OHUKIM | 570.68 | 62.42 |
| FAYPUS | 567.30 | 62.06 | OWITAQ | 571.02 | 62.46 |
| FEVFUJ | 563.09 | 61.60 | OWITEU | 571.04 | 62.46 |
| FECXUI | 569.31 | 62.27 | OWITIY | 570.97 | 62.45 |
| FIQCEN | 570.74 | 62.44 | OWITOE | 571.14 | 62.47 |
| GALBUS | 571.34 | 62.49 | OWITUK | 571.12 | 62.47 |
| GALHUY | 570.89 | 62.44 | OWIVAS | 571.12 | 62.47 |
| GITTUZ | 569.11 | 62.25 | OWIVEW | 571.08 | 62.46 |
| GITVEL | 567.12 | 62.03 | PEVQEO | 570.52 | 62.41 |
| GIVDUL | 569.52 | 62.30 | PODKUQ | 570.15 | 62.36 |
| GUPCOK | 569.82 | 62.34 | PURQOJ | 570.65 | 62.42 |
| GUSLUC | 566.30 | 61.96 | QIFLOI | 568.43 | 62.21 |
| HAJKIO | 570.99 | 62.46 | QOWQUO | 568.96 | 62.24 |
| HAJKOU | 570.97 | 62.50 | RAYKEJ | 571.03 | 62.46 |
| HASSUR | 571.18 | 62.47 | RAYKIN | 570.41 | 62.39 |
| HECQUB | 571.14 | 62.47 | RAYKUZ | 570.71 | 62.42 |
| HIFVUO | 570.43 | 62.39 | RAYLAG | 570.68 | 62.42 |
| IDIWOH | 571.39 | 62.50 | RAYLEK | 570.57 | 62.41 |
| IMIXEI | 570.76 | 62.43 | RAYLIO | 570.05 | 62.35 |
| JENKIX | 564.93 | 61.80 | RAYLOU | 569.84 | 62.33 |
| KARLAS | 568.03 | 62.14 | RAYLUA | 570.92 | 62.45 |
| KEYFIF | 569.21 | 62.26 | SOQSAU | 570.11 | 62.36 |
| KEYFIF01 | 568.06 | 62.14 | SOQSEY | 569.20 | 62.28 |
| KIPKIF | 570.63 | 62.42 | VEJYOZ | 568.53 | 62.19 |
| LARVIL | 571.38 | 62.50 | VEJZIU | 570.00 | 62.35 |
| LECQEQ | 571.19 | 62.47 | VOGTIV | 570.95 | 62.45 |
| LUMDIG | 570.81 | 62.44 | WOBHIF | 571.38 | 62.50 |
| MOCKEV | 570.09 | 62.36 | XALXUF01 | 570.48 | 62.40 |
| NEFTOJ | 570.75 | 62.44 | YOZBIZ01 | 570.01 | 62.35 |
| NIBHOW | 570.27 | 62.38 | YOZBOF | 567.54 | 62.08 |
| NIMPEG01 | 566.63 | 61.98 | YUVSUE | 570.17 | 62.37 |

**Table S9.** Calculated permeability and selectivity data for 6FDA-DAM-based MMMs.

| **ϕ = 0.3** | **PCO2 (Barrer)** | **SCO2/N2** | **ϕ = 0.3** | **PCO2 (Barrer)** | **SCO2/N2** |
| --- | --- | --- | --- | --- | --- |
| EDUSIF | 1909.92 | 15.21 | NUJCIE | 1910.58 | 15.57 |
| EDUSUR | 1883.11 | 15.00 | NUTQAV | 1919.63 | 15.30 |
| EDUVII | 1920.32 | 15.28 | NUTQEZ | 1922.47 | 15.31 |
| EDUVOO | 1908.76 | 15.20 | OCIZIL | 1917.49 | 15.26 |
| EHALOP | 1924.48 | 15.31 | OHUKIM | 1917.05 | 15.26 |
| FAYPUS | 1879.68 | 14.99 | OWITAQ | 1920.82 | 15.29 |
| FEVFUJ | 1835.12 | 14.62 | OWITEU | 1921.07 | 15.29 |
| FECXUI | 1901.73 | 15.15 | OWITIY | 1920.33 | 15.29 |
| FIQCEN | 1917.75 | 15.30 | OWITOE | 1922.21 | 15.30 |
| GALBUS | 1924.50 | 15.31 | OWITUK | 1921.97 | 15.30 |
| GALHUY | 1919.44 | 15.28 | OWIVAS | 1922.01 | 15.30 |
| GITTUZ | 1899.54 | 15.14 | OWIVEW | 1921.53 | 15.30 |
| GITVEL | 1877.77 | 14.95 | PEVQEO | 1915.23 | 15.25 |
| GIVDUL | 1904.11 | 15.19 | PODKUQ | 1911.12 | 15.22 |
| GUPCOK | 1907.46 | 15.21 | PURQOJ | 1916.66 | 15.27 |
| GUSLUC | 1868.92 | 14.93 | QIFLOI | 1892.08 | 15.17 |
| HAJKIO | 1920.51 | 15.31 | QOWQUO | 1897.91 | 15.13 |
| HAJKOU | 1920.33 | 15.44 | RAYKEJ | 1920.97 | 15.29 |
| HASSUR | 1922.66 | 15.30 | RAYKIN | 1914.05 | 15.24 |
| HECQUB | 1922.25 | 15.30 | RAYKUZ | 1917.37 | 15.26 |
| HIFVUO | 1914.20 | 15.24 | RAYLAG | 1917.09 | 15.27 |
| IDIWOH | 1925.12 | 15.32 | RAYLEK | 1915.86 | 15.26 |
| IMIXEI | 1917.98 | 15.28 | RAYLIO | 1909.99 | 15.21 |
| JENKIX | 1854.39 | 14.79 | RAYLOU | 1907.61 | 15.19 |
| KARLAS | 1887.63 | 15.05 | RAYLUA | 1919.76 | 15.29 |
| KEYFIF | 1900.63 | 15.15 | SOQSAU | 1910.63 | 15.23 |
| KEYFIF01 | 1887.95 | 15.04 | SOQSEY | 1900.52 | 15.19 |
| KIPKIF | 1916.51 | 15.26 | VEJYOZ | 1893.10 | 15.09 |
| LARVIL | 1924.95 | 15.33 | VEJZIU | 1909.42 | 15.21 |
| LECQEQ | 1922.77 | 15.30 | VOGTIV | 1920.09 | 15.28 |
| LUMDIG | 1918.55 | 15.28 | WOBHIF | 1924.94 | 15.32 |
| MOCKEV | 1910.46 | 15.22 | XALXUF01 | 1914.75 | 15.25 |
| NEFTOJ | 1917.82 | 15.29 | YOZBIZ01 | 1909.51 | 15.21 |
| NIBHOW | 1912.48 | 15.23 | YOZBOF | 1882.35 | 14.99 |
| NIMPEG01 | 1872.51 | 14.93 | YUVSUE | 1911.28 | 15.24 |

**Table S10.** Calculated permeability and selectivity data for PIM-7-based MMMs.

| **ϕ = 0.3** | **PCO2 (Barrer)** | **SCO2/N2** | **ϕ = 0.3** | **PCO2 (Barrer)** | **SCO2/N2** |
| --- | --- | --- | --- | --- | --- |
| EDUSIF | 2487.79 | 25.93 | NUJCIE | 2488.92 | 26.41 |
| EDUSUR | 2442.66 | 25.46 | NUTQAV | 2504.28 | 26.13 |
| EDUVII | 2505.44 | 26.10 | NUTQEZ | 2509.11 | 26.16 |
| EDUVOO | 2485.84 | 25.91 | OCIZIL | 2500.63 | 26.06 |
| EHALOP | 2512.54 | 26.17 | OHUKIM | 2499.89 | 26.05 |
| FAYPUS | 2436.91 | 25.43 | OWITAQ | 2506.31 | 26.11 |
| FEVFUJ | 2363.12 | 24.65 | OWITEU | 2506.73 | 26.12 |
| FECXUI | 2473.95 | 25.80 | OWITIY | 2505.47 | 26.11 |
| FIQCEN | 2501.09 | 26.11 | OWITOE | 2508.67 | 26.14 |
| GALBUS | 2512.56 | 26.18 | OWITUK | 2508.26 | 26.14 |
| GALHUY | 2503.96 | 26.10 | OWIVAS | 2508.32 | 26.14 |
| GITTUZ | 2470.25 | 25.76 | OWIVEW | 2507.50 | 26.13 |
| GITVEL | 2433.72 | 25.37 | PEVQEO | 2496.79 | 26.03 |
| GIVDUL | 2477.97 | 25.87 | PODKUQ | 2489.82 | 25.95 |
| GUPCOK | 2483.64 | 25.92 | PURQOJ | 2499.23 | 26.06 |
| GUSLUC | 2418.97 | 25.27 | QIFLOI | 2457.69 | 25.75 |
| HAJKIO | 2505.78 | 26.14 | QOWQUO | 2467.51 | 25.74 |
| HAJKOU | 2505.47 | 26.31 | RAYKEJ | 2506.56 | 26.12 |
| HASSUR | 2509.43 | 26.15 | RAYKIN | 2494.79 | 26.01 |
| HECQUB | 2508.74 | 26.14 | RAYKUZ | 2500.44 | 26.06 |
| HIFVUO | 2495.06 | 26.01 | RAYLAG | 2499.95 | 26.07 |
| IDIWOH | 2513.62 | 26.19 | RAYLEK | 2497.86 | 26.04 |
| IMIXEI | 2501.48 | 26.09 | RAYLIO | 2487.92 | 25.93 |
| JENKIX | 2394.86 | 25.00 | RAYLOU | 2483.89 | 25.89 |
| KARLAS | 2450.23 | 25.57 | RAYLUA | 2504.49 | 26.11 |
| KEYFIF | 2472.09 | 25.78 | SOQSAU | 2489.00 | 25.96 |
| KEYFIF01 | 2450.76 | 25.55 | SOQSEY | 2471.90 | 25.84 |
| KIPKIF | 2498.97 | 26.05 | VEJYOZ | 2459.42 | 25.66 |
| LARVIL | 2513.34 | 26.20 | VEJZIU | 2486.95 | 25.93 |
| LECQEQ | 2509.62 | 26.14 | VOGTIV | 2505.06 | 26.10 |
| LUMDIG | 2502.44 | 26.09 | WOBHIF | 2513.32 | 26.18 |
| MOCKEV | 2488.70 | 25.95 | XALXUF01 | 2495.98 | 26.02 |
| NEFTOJ | 2501.20 | 26.10 | YOZBIZ01 | 2487.10 | 25.93 |
| NIBHOW | 2492.14 | 25.97 | YOZBOF | 2441.38 | 25.45 |
| NIMPEG01 | 2424.94 | 25.30 | YUVSUE | 2490.11 | 25.98 |

**Table S11.** Calculated permeability and selectivity data for modified PDMS-based MMMs.

| **ϕ = 0.3** | **PCO2 (Barrer)** | **SCO2/N2** | **ϕ = 0.3** | **PCO2 (Barrer)** | **SCO2/N2** |
| --- | --- | --- | --- | --- | --- |
| EDUSIF | 4484.87 | 33.57 | NUJCIE | 4488.49 | 34.45 |
| EDUSUR | 4341.93 | 32.51 | NUTQAV | 4538.51 | 34.02 |
| EDUVII | 4542.31 | 33.98 | NUTQEZ | 4554.34 | 34.10 |
| EDUVOO | 4478.56 | 33.52 | OCIZIL | 4526.57 | 33.87 |
| EHALOP | 4565.65 | 34.15 | OHUKIM | 4524.14 | 33.85 |
| FAYPUS | 4324.14 | 32.43 | OWITAQ | 4545.15 | 34.00 |
| FEVFUJ | 4103.11 | 30.74 | OWITEU | 4546.53 | 34.02 |
| FECXUI | 4440.42 | 33.25 | OWITIY | 4542.40 | 33.99 |
| FIQCEN | 4528.05 | 33.96 | OWITOE | 4552.89 | 34.06 |
| GALBUS | 4565.73 | 34.15 | OWITUK | 4551.56 | 34.05 |
| GALHUY | 4537.44 | 33.96 | OWIVAS | 4551.75 | 34.06 |
| GITTUZ | 4428.64 | 33.17 | OWIVEW | 4549.08 | 34.05 |
| GITVEL | 4314.28 | 32.29 | PEVQEO | 4514.04 | 33.80 |
| GIVDUL | 4453.28 | 33.40 | PODKUQ | 4491.43 | 33.62 |
| GUPCOK | 4471.47 | 33.53 | PURQOJ | 4522.00 | 33.86 |
| GUSLUC | 4269.11 | 32.06 | QIFLOI | 4388.93 | 33.08 |
| HAJKIO | 4543.41 | 34.05 | QOWQUO | 4419.93 | 33.12 |
| HAJKOU | 4542.40 | 34.35 | RAYKEJ | 4545.97 | 34.02 |
| HASSUR | 4555.40 | 34.08 | RAYKIN | 4507.53 | 33.74 |
| HECQUB | 4553.13 | 34.07 | RAYKUZ | 4525.92 | 33.87 |
| HIFVUO | 4508.41 | 33.75 | RAYLAG | 4524.34 | 33.89 |
| IDIWOH | 4569.21 | 34.17 | RAYLEK | 4517.53 | 33.82 |
| IMIXEI | 4529.33 | 33.93 | RAYLIO | 4485.27 | 33.57 |
| JENKIX | 4196.48 | 31.47 | RAYLOU | 4472.28 | 33.48 |
| KARLAS | 4365.52 | 32.73 | RAYLUA | 4539.19 | 33.99 |
| KEYFIF | 4434.51 | 33.22 | SOQSAU | 4488.76 | 33.64 |
| KEYFIF01 | 4367.19 | 32.71 | SOQSEY | 4433.90 | 33.32 |
| KIPKIF | 4521.15 | 33.85 | VEJYOZ | 4394.36 | 32.93 |
| LARVIL | 4568.31 | 34.20 | VEJZIU | 4482.15 | 33.57 |
| LECQEQ | 4556.04 | 34.08 | VOGTIV | 4541.06 | 33.97 |
| LUMDIG | 4532.46 | 33.94 | WOBHIF | 4568.23 | 34.17 |
| MOCKEV | 4487.80 | 33.62 | XALXUF01 | 4511.39 | 33.78 |
| NEFTOJ | 4528.42 | 33.95 | YOZBIZ01 | 4482.62 | 33.56 |
| NIBHOW | 4498.93 | 33.67 | YOZBOF | 4337.95 | 32.48 |
| NIMPEG01 | 4287.33 | 32.13 | YUVSUE | 4492.34 | 33.68 |

**Table S12.** Calculated permeability and selectivity data for PIM-1-based MMMs.

| **ϕ = 0.3** | **PCO2 (Barrer)** | **SCO2/N2** | **ϕ = 0.3** | **PCO2 (Barrer)** | **SCO2/N2** |
| --- | --- | --- | --- | --- | --- |
| EDUSIF | 5143.11 | 24.49 | NUJCIE | 5147.87 | 25.48 |
| EDUSUR | 4956.72 | 23.61 | NUTQAV | 5213.67 | 24.88 |
| EDUVII | 5218.69 | 24.83 | NUTQEZ | 5234.56 | 24.93 |
| EDUVOO | 5134.83 | 24.45 | OCIZIL | 5197.94 | 24.74 |
| EHALOP | 5249.51 | 24.97 | OHUKIM | 5194.74 | 24.73 |
| FAYPUS | 4933.68 | 23.56 | OWITAQ | 5222.42 | 24.85 |
| FEVFUJ | 4650.49 | 22.17 | OWITEU | 5224.25 | 24.87 |
| FECXUI | 5084.89 | 24.23 | OWITIY | 5218.80 | 24.84 |
| FIQCEN | 5199.89 | 24.84 | OWITOE | 5232.65 | 24.90 |
| GALBUS | 5249.61 | 24.97 | OWITUK | 5230.88 | 24.89 |
| GALHUY | 5212.27 | 24.81 | OWIVAS | 5231.14 | 24.89 |
| GITTUZ | 5069.51 | 24.17 | OWIVEW | 5227.62 | 24.89 |
| GITVEL | 4920.94 | 23.43 | PEVQEO | 5181.44 | 24.68 |
| GIVDUL | 5101.72 | 24.38 | PODKUQ | 5151.72 | 24.53 |
| GUPCOK | 5125.54 | 24.48 | PURQOJ | 5191.91 | 24.74 |
| GUSLUC | 4862.66 | 23.28 | QIFLOI | 5017.74 | 24.16 |
| HAJKIO | 5220.14 | 24.90 | QOWQUO | 5058.13 | 24.12 |
| HAJKOU | 5218.80 | 25.25 | RAYKEJ | 5223.51 | 24.87 |
| HASSUR | 5235.96 | 24.91 | RAYKIN | 5172.88 | 24.64 |
| HECQUB | 5232.96 | 24.90 | RAYKUZ | 5197.08 | 24.74 |
| HIFVUO | 5174.03 | 24.64 | RAYLAG | 5195.00 | 24.76 |
| IDIWOH | 5254.21 | 24.99 | RAYLEK | 5186.03 | 24.70 |
| IMIXEI | 5201.57 | 24.80 | RAYLIO | 5143.64 | 24.49 |
| JENKIX | 4769.45 | 22.78 | RAYLOU | 5126.60 | 24.42 |
| KARLAS | 4987.31 | 23.81 | RAYLUA | 5214.57 | 24.85 |
| KEYFIF | 5077.17 | 24.21 | SOQSAU | 5148.22 | 24.56 |
| KEYFIF01 | 4989.49 | 23.78 | SOQSEY | 5076.37 | 24.32 |
| KIPKIF | 5190.80 | 24.73 | VEJYOZ | 5024.81 | 23.97 |
| LARVIL | 5253.01 | 25.02 | VEJZIU | 5139.54 | 24.49 |
| LECQEQ | 5236.81 | 24.91 | VOGTIV | 5217.04 | 24.82 |
| LUMDIG | 5205.70 | 24.80 | WOBHIF | 5252.92 | 24.98 |
| MOCKEV | 5146.96 | 24.54 | XALXUF01 | 5177.96 | 24.67 |
| NEFTOJ | 5200.37 | 24.82 | YOZBIZ01 | 5140.15 | 24.49 |
| NIBHOW | 5161.57 | 24.57 | YOZBOF | 4951.56 | 23.59 |
| NIMPEG01 | 4886.14 | 23.31 | YUVSUE | 5152.92 | 24.60 |

**Table S13.** Calculated permeability and selectivity data for PTMGP-based MMMs.

| **ϕ = 0.3** | **PCO2 (Barrer)** | **SCO2/N2** | **ϕ = 0.3** | **PCO2 (Barrer)** | **SCO2/N2** |
| --- | --- | --- | --- | --- | --- |
| EDUSIF | 28327.22 | 12.58 | NUJCIE | 28461.21 | 17.29 |
| EDUSUR | 24027.72 | 10.70 | NUTQAV | 30476.53 | 13.83 |
| EDUVII | 30643.88 | 13.46 | NUTQEZ | 31187.65 | 13.89 |
| EDUVOO | 28097.72 | 12.48 | OCIZIL | 29965.29 | 13.23 |
| EHALOP | 31719.95 | 13.91 | OHUKIM | 29863.68 | 13.20 |
| FAYPUS | 23599.10 | 10.80 | OWITAQ | 30769.95 | 13.54 |
| FEVFUJ | 19513.27 | 8.78 | OWITEU | 30832.06 | 13.62 |
| FECXUI | 26799.28 | 11.99 | OWITIY | 30647.65 | 13.52 |
| FIQCEN | 30027.51 | 13.76 | OWITOE | 31120.99 | 13.70 |
| GALBUS | 31723.57 | 13.91 | OWITUK | 31059.63 | 13.68 |
| GALHUY | 30430.21 | 13.46 | OWIVAS | 31068.45 | 13.69 |
| GITTUZ | 26427.05 | 11.87 | OWIVEW | 30947.00 | 13.72 |
| GITVEL | 23369.84 | 10.37 | PEVQEO | 29449.87 | 13.12 |
| GIVDUL | 27220.88 | 12.51 | PODKUQ | 28570.86 | 12.68 |
| GUPCOK | 27845.14 | 12.73 | PURQOJ | 29774.57 | 13.32 |
| GUSLUC | 22385.84 | 10.48 | QIFLOI | 25258.46 | 12.48 |
| HAJKIO | 30692.65 | 13.90 | QOWQUO | 26159.31 | 11.81 |
| HAJKOU | 30647.62 | 15.80 | RAYKEJ | 30806.90 | 13.63 |
| HASSUR | 31236.39 | 13.76 | RAYKIN | 29190.32 | 12.98 |
| HECQUB | 31131.73 | 13.72 | RAYKUZ | 29938.00 | 13.25 |
| HIFVUO | 29224.74 | 12.99 | RAYLAG | 29871.95 | 13.40 |
| IDIWOH | 31891.88 | 13.97 | RAYLEK | 29591.19 | 13.18 |
| IMIXEI | 30081.59 | 13.52 | RAYLIO | 28342.20 | 12.55 |
| JENKIX | 21003.37 | 9.61 | RAYLOU | 27873.53 | 12.40 |
| KARLAS | 24626.49 | 11.22 | RAYLUA | 30506.51 | 13.63 |
| KEYFIF | 26610.97 | 11.99 | SOQSAU | 28471.25 | 12.88 |
| KEYFIF01 | 24670.37 | 11.05 | SOQSEY | 26591.54 | 12.54 |
| KIPKIF | 29739.75 | 13.26 | VEJYOZ | 25410.71 | 11.51 |
| LARVIL | 31847.85 | 14.19 | VEJZIU | 28227.64 | 12.64 |
| LECQEQ | 31266.21 | 13.71 | VOGTIV | 30588.74 | 13.44 |
| LUMDIG | 30214.96 | 13.49 | WOBHIF | 31844.36 | 13.96 |
| MOCKEV | 28435.63 | 12.78 | XALXUF01 | 29343.49 | 13.08 |
| NEFTOJ | 30043.05 | 13.67 | YOZBIZ01 | 28244.82 | 12.60 |
| NIBHOW | 28855.25 | 12.77 | YOZBOF | 23930.19 | 10.68 |
| NIMPEG01 | 22770.08 | 10.30 | YUVSUE | 28605.06 | 13.02 |

**Table S14.** Calculated permeability and selectivity data for PTMSP-based MMMs.

| **ϕ = 0.3** | **PCO2 (Barrer)** | **SCO2/N2** | **ϕ = 0.3** | **PCO2 (Barrer)** | **SCO2/N2** |
| --- | --- | --- | --- | --- | --- |
| EDUSIF | 52788.70 | 8.89 | NUJCIE | 53212.63 | 15.91 |
| EDUSUR | 41203.43 | 6.99 | NUTQAV | 60173.73 | 10.71 |
| EDUVII | 60805.99 | 9.97 | NUTQEZ | 62924.67 | 10.68 |
| EDUVOO | 52072.78 | 8.78 | OCIZIL | 58296.94 | 9.68 |
| EHALOP | 65099.24 | 10.61 | OHUKIM | 57933.44 | 9.65 |
| FAYPUS | 40228.61 | 7.31 | OWITAQ | 61288.31 | 10.09 |
| FEVFUJ | 32155.75 | 5.61 | OWITEU | 61527.87 | 10.23 |
| FECXUI | 48250.69 | 8.29 | OWITIY | 60820.34 | 10.07 |
| FIQCEN | 58521.07 | 10.67 | OWITOE | 62659.51 | 10.32 |
| GALBUS | 65114.39 | 10.62 | OWITUK | 62416.78 | 10.30 |
| GALHUY | 60000.32 | 10.01 | OWIVAS | 62451.60 | 10.32 |
| GITTUZ | 47221.61 | 8.19 | OWIVEW | 61974.63 | 10.40 |
| GITVEL | 39718.44 | 6.68 | PEVQEO | 56484.21 | 9.60 |
| GIVDUL | 49450.97 | 9.08 | PODKUQ | 53562.89 | 9.02 |
| GUPCOK | 51299.46 | 9.29 | PURQOJ | 57617.16 | 9.90 |
| GUSLUC | 37613.01 | 7.21 | QIFLOI | 44164.56 | 9.47 |
| HAJKIO | 60991.94 | 10.79 | QOWQUO | 46498.46 | 8.17 |
| HAJKOU | 60820.21 | 14.12 | RAYKEJ | 61430.68 | 10.25 |
| HASSUR | 63119.53 | 10.41 | RAYKIN | 55600.01 | 9.41 |
| HECQUB | 62702.11 | 10.37 | RAYKUZ | 58198.99 | 9.73 |
| HIFVUO | 55716.19 | 9.41 | RAYLAG | 57962.89 | 10.02 |
| IDIWOH | 65824.08 | 10.71 | RAYLEK | 56973.59 | 9.68 |
| IMIXEI | 58716.82 | 10.21 | RAYLIO | 52835.87 | 8.83 |
| JENKIX | 34867.71 | 6.33 | RAYLOU | 51385.63 | 8.69 |
| KARLAS | 42612.97 | 7.65 | RAYLUA | 60286.32 | 10.32 |
| KEYFIF | 47726.58 | 8.34 | SOQSAU | 53244.56 | 9.41 |
| KEYFIF01 | 42718.54 | 7.37 | SOQSEY | 47672.92 | 9.28 |
| KIPKIF | 57494.22 | 9.79 | VEJYOZ | 44548.66 | 7.90 |
| LARVIL | 65637.36 | 11.15 | VEJZIU | 52476.49 | 9.03 |
| LECQEQ | 63239.17 | 10.32 | VOGTIV | 60596.65 | 9.93 |
| LUMDIG | 59203.35 | 10.11 | WOBHIF | 65622.60 | 10.69 |
| MOCKEV | 53131.34 | 9.23 | XALXUF01 | 56119.56 | 9.56 |
| NEFTOJ | 58577.20 | 10.49 | YOZBIZ01 | 52530.18 | 8.97 |
| NIBHOW | 54485.61 | 9.10 | YOZBOF | 40979.17 | 6.99 |
| NIMPEG01 | 38419.34 | 6.78 | YUVSUE | 53672.76 | 9.63 |

**
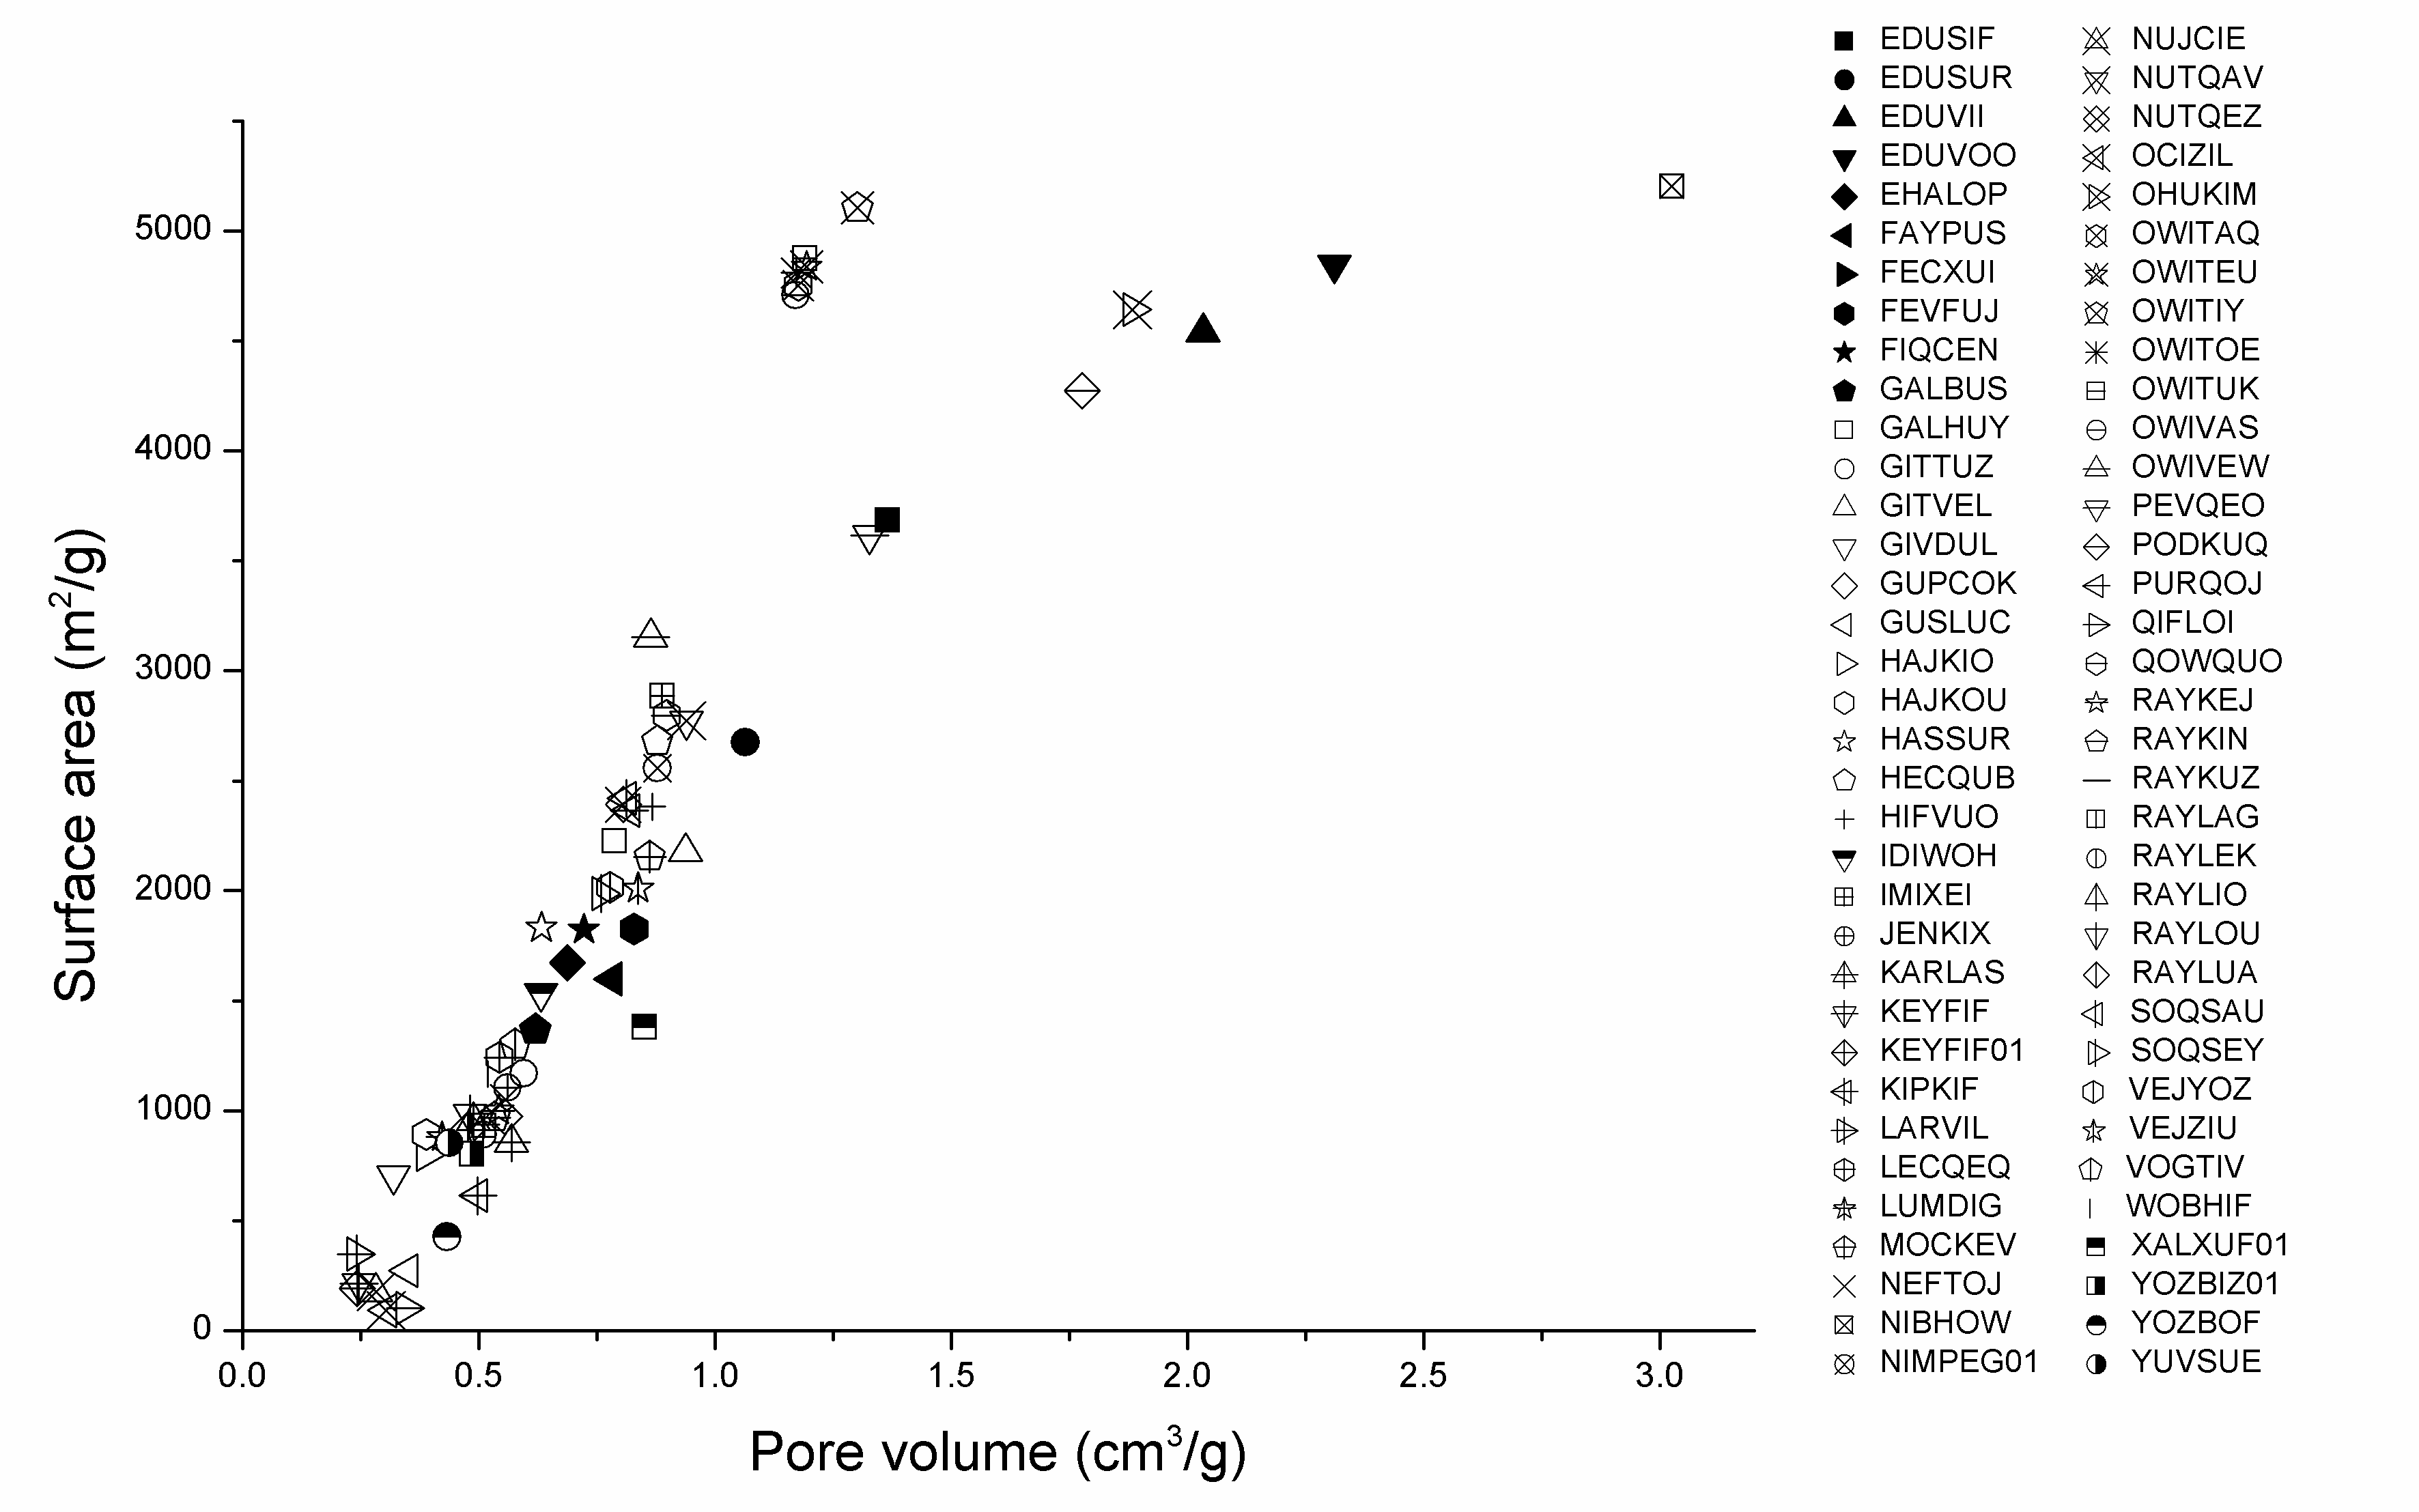
**

**Figure S1.** Calculated accessible surface area vs. pore volume of the MOFs.

**References:**

1. T. Düren, F. Millange, G. Férey, K. S. Walton and R. Q. Snurr, *J. Phys. Chem. C*, 2007, **111**, 15350-15356.

2. L. M. Robeson, *J. Membr. Sci.*, 2008, **320**, 390-400.
